# Supplementary material
Source: PubMed Central journal article supplement (PMC2900882)
Supplement: cwp200_6.pdf [file cwp200_6.pdf]

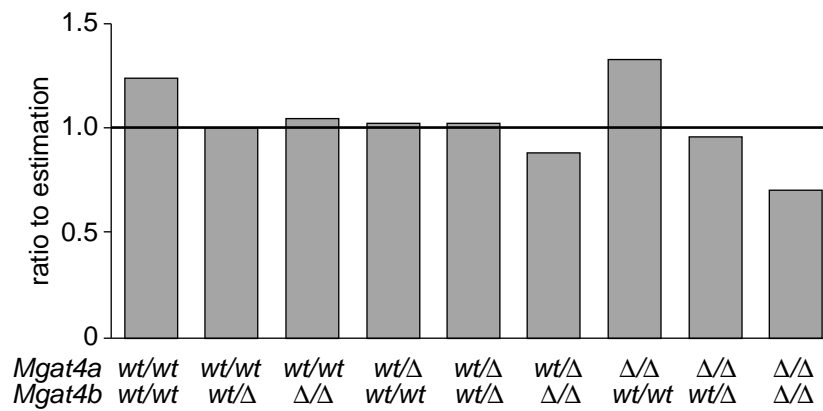

**Supplementary Figure 6. The natality of offspring from *Mgat4a/Mgat4b* heterozygote breeding.**

The genotype of 768 offspring from *Mgat4a/Mgat4b* heterozygote breeding was analyzed by PCR. The birth rate of each genotype was calculated and indicated as the ratio to the estimated natality based on Mendelian inheritance manner.
